# Supplementary material for: Heterologous VvDREB2c Expression Improves Heat Tolerance in Arabidopsis by Inducing Photoprotective Responses
Source: MDPI journal article supplement (doi:10.3390/ijms24065989), 2023-03-22
Supplement: s1 [file s1]

Supplementary file S1. The sequence and protein of VvDREB2c.

>VvDREB2c sequence

ATGGATACCTGCGTTCAAGGTTCTAATAAGACTTCTTTTCCATTTGCTTCTTCCAGGAAG  
AGAAAGTCTCGAAGCCGGCGAAGTGGACCTAATTCCGTGGCCGAGACTCTTGCAAGA  
TGGAACAATACAACGATATACTTGATTCTGTCCGCAAAGCTCCAGCAAAAGGTTCAA  
AGAAGGGGTGTATGAAAGGTAAAGGGGGGCCCCGAGAATTCAATATGTGGTTACAGGG  
GTGTGAGGCAGAGGACATGGGGTAAATGGGTTGCTGAGATTCTGGGAGCCAAACAGAG  
GGAGTAGGCTATGGTTAGGTACCTTCCCAACTGCCATTGAAGCTGCTCTTGCCATATGAC  
GAAGCTGCAAGGGCCATGTATGGTTCTTCTGCCCCGTCTTAATCTTCCAAATTACACCAC  
GTCTTTGAAGGATTCTTCTTCGGCTCCAACCTACATCGGTTTCTGATTCCACCACGACAA  
CATCCAACCTACTCTGAAGTGTGTGCATATGAGGATTCAAAGAAGCCTGTTTTACCGAGT  
ATCAAACATGAAAGTGGCGAAGGTGAATCAGGAATAAGTGGTGGTATGCTTTCTGCAG  
TGGTTAAAGCTGAACCTGCCACACCAGTTAGTTTGGTAACACAGGGAGGAGGTAATGA  
TCCTGTCAATGTAGGTAATGAACCTGTTGATGCAATGAAGCTCCAGCATGAAGAAAAC  
GGTCATTCTTTGGATGCCATGTACTTCAAGAATGAAGACGGAGGACAGGATTTCTTGG  
AAGGATTCCTATGGATGAAATGTTTGATGTGGATGAATTTTGAAGGGCCATAGACTCT  
GACCCCTTGTAGCTATGGTACAAGGCAGGAATTGGGTCATGATTCTGGGCAAGTAG  
GGAGCTTTGAACTGATAATATGCAGTGGGAAAAGCCAACGGATTTATCTTACCAACTG  
CAAAATCCAGATGCTAAGCTTCTTGGGAGTTTGAATCATATGGAGCAAGTGCCTTCTGA  
CTTTGATTATTGCTATGGCTTCTTGCAGCCAGGCAAGCAGTTAGATCCCTGTATAGGGTT  
GAATGATCAGGGGTACTTGATTTGGAATTATCAGATATGGGGTTCTAA

>VvDREB2c protein

MDTCVQGSNKTSFPFASSRKRKRSRRSGPNSVAETLARWKQYNDILDSVRKAPAKGSKK  
GCMKGKGGPENSICGYRGVRQRTWGWVAEIREPNRGSRLWLGTFFPTAIEAALAYDEAA  
RAMYGSSARLNLPNYTTSLKDSSSAPTTSVSDSTTTTSNYSEVCAYEDSKKPVLPSIKHES  
GEGESGISGMLS AVVKAEPATPVSLVTQGGGNDPVNVGNEPVDAMKLQHEENGHSLDA  
MYFKNEDGGQDFLEGFPMDEMFDVDEFLRAIDSDPLASYGTRQELGHDSGQVGSFETDN  
MQWEKPTDLSYQLQNPDAKLLGSLNHMEQVPSDFDYCYGFLQPGKQLDPCIGLNDQGL  
LDLELSDMGF\*
