# Supplementary material for: Heterologous VvDREB2c Expression Improves Heat Tolerance in Arabidopsis by Inducing Photoprotective Responses
Source: MDPI journal article supplement (doi:10.3390/ijms24065989), 2023-03-22
Supplement: s1 [file s1]

Table S2. Information on hormone standard samples

| Name                               | Hormone | Molecular formula                              | Molecular weight |
|------------------------------------|---------|------------------------------------------------|------------------|
| (+/-)-Absciscic acid               | ABA     | C <sub>15</sub> H <sub>20</sub> O <sub>4</sub> | 264.32           |
| 1-Aminocyclopropanecarboxylic acid | ACC     | C <sub>4</sub> H <sub>7</sub> NO <sub>2</sub>  | 101.105          |
| 3- $\alpha$ -Indoleacetic acid     | IAA     | C <sub>10</sub> H <sub>9</sub> O <sub>2</sub>  | 175.19           |
| (+/-)-Jasmonic acid                | JA      | C <sub>12</sub> H <sub>18</sub> O <sub>3</sub> | 210.27           |
| Salicylic acid                     | SA      | C <sub>7</sub> H <sub>6</sub> O <sub>3</sub>   | 138.12           |
