# Supplementary material for: Heterologous VvDREB2c Expression Improves Heat Tolerance in Arabidopsis by Inducing Photoprotective Responses
Source: MDPI journal article supplement (doi:10.3390/ijms24065989), 2023-03-22
Supplement: s1 [file s1]

Table S6. Number of genes in each module

| Modules   | Counts |
|-----------|--------|
| turquoise | 1320   |
| green     | 220    |
| blue      | 185    |
| grey      | 110    |
| brown     | 97     |
| magenta   | 93     |
| red       | 56     |
| purple    | 27     |
