# Supplementary material for: Heterologous VvDREB2c Expression Improves Heat Tolerance in Arabidopsis by Inducing Photoprotective Responses
Source: MDPI journal article supplement (doi:10.3390/ijms24065989), 2023-03-22
Supplement: s1 [file s1]

Table S3. Linear equation table

| Compound | Equation             | R-squared |
|----------|----------------------|-----------|
| ABA      | $y=8.27e^4x-1.39e^4$ | 0.9999    |
| ACC      | $y=6.07e^4x+6.55^4$  | 0.9999    |
| IAA      | $y=5.26e^4x+7.57e^3$ | 0.9994    |
| JA       | $Y=4.8e^4x-1.76e^4$  | 0.9998    |
| SA       | $y=4.35e^5x+3.11e^5$ | 1         |
