# Supplementary material for: Heterologous VvDREB2c Expression Improves Heat Tolerance in Arabidopsis by Inducing Photoprotective Responses
Source: MDPI journal article supplement (doi:10.3390/ijms24065989), 2023-03-22
Supplement: s1 [file s1]

Table S1. Amplifying transcript of gene by quantitative PCR

| Gene name                       | Primer sequence             |                              | Ref                  |
|---------------------------------|-----------------------------|------------------------------|----------------------|
|                                 | Forward                     | Reverse                      |                      |
| <i>VvDREB2c</i>                 | ATGGATACCTGCGTTCAAGGTTCT    | TTAGAACCCCATATCTGATAATTCCAAA | Designed             |
| <i>VvGAPDH</i>                  | TTCCGTGTTCTACTGTTG          | CCTCTGACTCCTCCTTGAT          | Guillaumie           |
| <i>VvEF1<math>\gamma</math></i> | CAAGAGAAACCATCCCTAGCTG      | TCAATCTGTCTAGGAAAGGAAG       | et al., 2013         |
| <i>AtACTIN2</i>                 | CTTGCACCAAGCAGCATGAA        | CCGATCCAGACACTGTACTTCCTT     | Remans et            |
| <i>AtUBQ10</i>                  | GGCCTTGTATAATCCCTGATGAATAAG | AAAGAGATAACAGGAACGGAAACATAGT | al., 2008            |
| <i>AtHSP70</i>                  | CCTACCAACACCGTCTTCGA        | CTTCTCACCTGGACCGGAAA         |                      |
| <i>AtHSP18.2</i>                | CCGTTCTCGCAAGACTTATGG       | GAAGCGTTTGCCAACGCAGAA        | Ikeda et al.<br>2011 |
| <i>AtHSA2</i>                   | GGAAGCAGCGTTGGATGTGA        | TAGATCTTGGCTGTCCCAATCCA      |                      |
| <i>AtHSP21</i>                  | ATGGACGTCTCTCCTTTTCGGATT    | CTGTTTCTTCCTGAGACAGGCATA     |                      |
| <i>AtLFG4</i>                   | GCGTTTTTTTTCCCCATTCGTC      | GGGCTCTCAAGCATAGTCGGATA      |                      |
| <i>AtF22G5.11</i>               | TACGACGACGGAGATACGGTGAC     | CCGCTTGGGAGGCTGCT            |                      |
| <i>AT1G16022</i>                | TCTCATTGGACTCCCAGAAACTCG    | TTTTCCGCCTGTAACTCCACGAC      |                      |
| <i>AtF2E2.18</i>                | TCATCTTCTTCTTCCCTCCGCC      | ACAACATCGTTCCCTTCGTCAG       |                      |
| <i>AtBGLU34</i>                 | CCAAAGAACCCTTCCACTGC        | CCCCCAGTCAGTCTTCCCTT         | Designed             |
| <i>AtGOLS2</i>                  | ACAAAGAAGATGGCACCTGAGA      | CTTAGCCCCTTAGCAAGACCC        |                      |
| <i>AtCSD2</i>                   | TCGTCTTCTCATTCCTCCTTCC      | TGAGTCATCTTGGGTCAAAGTAACA    |                      |
| <i>AtMYB102</i>                 | AAGTGGTCTGCGATTGCGGC        | TGGATGTTGCTGGTGATGACGAC      |                      |
| <i>AtFLP1</i>                   | CACACACTCTACACGGTTTCCTTAT   | CCTCATCCTCTGCTGCTGGTT        |                      |
| <i>AtT3P16.120</i>              | GGTGACGGGACCTGATGGG         | CCTCTTGGCAGCGGGACA           |                      |
